# Supplementary material for: Nanostructured WO3 photoanodes for efficient water splitting via anodisation in citric acid
Source: Royal Society of Chemistry journal article supplement (doi:10.1039/c7ra05342h), 2017-01-01
Supplement: c7ra05342h1.pdf [file c7ra05342h1.pdf]

## Electronic Supporting Information

### Nanostructured WO<sub>3</sub> photoanodes for efficient water splitting via anodisation in citric acid

Jifang Zhang,<sup>a</sup> Ivette Salles,<sup>b</sup> Sam Pering,<sup>c</sup> Petra J. Cameron,<sup>c</sup> Davide Mattia,<sup>a</sup> and Salvador Eslava<sup>\*a</sup>

a. Department of Chemical Engineering, University of Bath, Bath BA2 7AY, UK. E-mail: s.eslava@bath.ac.uk

b. Departament d'Enginyeria Química, Biològica i Ambiental, Universitat Autònoma de Barcelona, Bellaterra 08193, Spain

c. Department of Chemistry, University of Bath, UK

*\*All data created during this research are openly available from the University of Bath data archive at <https://doi.org/10.15125/BATH-00418>*

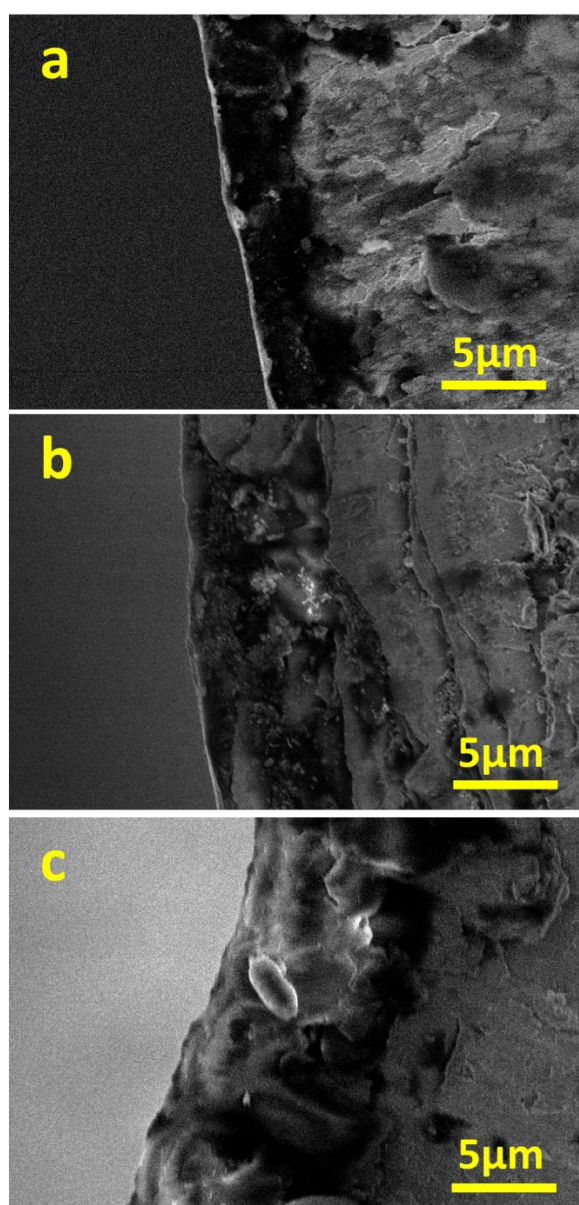

Figure S1. Representative cross sectional FESEM images for WO<sub>3</sub> photoanodes produced in CA/H<sub>2</sub>O at 0.1 A for 30 min (a), in CA/NMF/H<sub>2</sub>O at 0.015 A for 30 min (b), and in NH<sub>4</sub>F/NMF/H<sub>2</sub>O at 40 V for 6 h (c). The average thicknesses of each film are 3.7±1.5, 5.8±1.7 and 7.4±2.7 μm, respectively. Cross-sections were prepared by cutting the photoanodes with tongs.

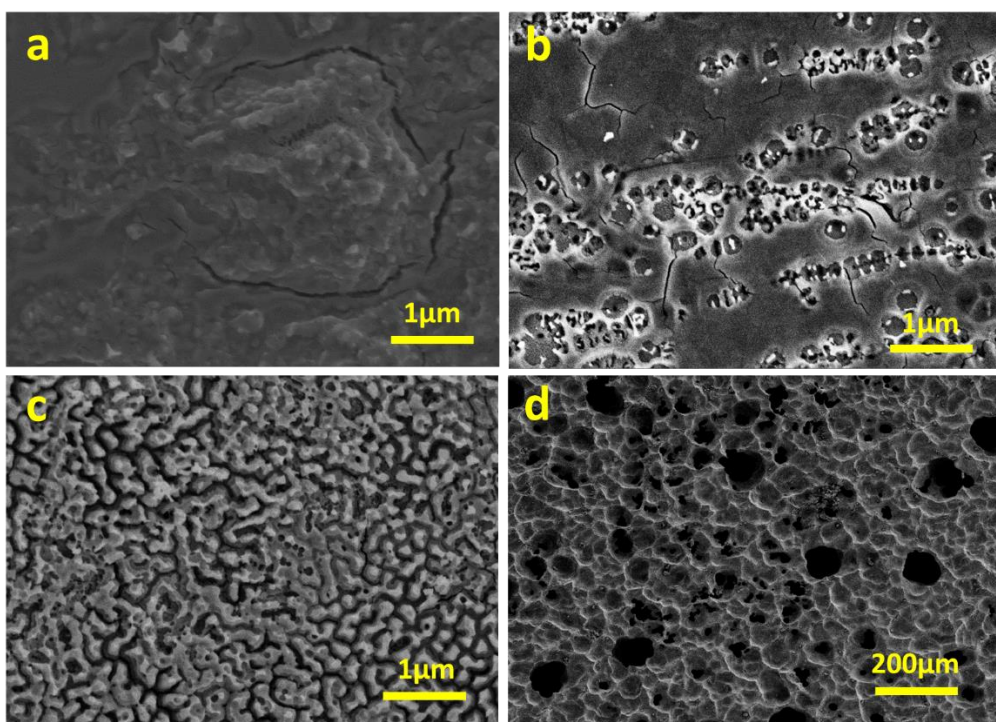

Figure S2. FESEM micrographs of the morphological transformation of  $\text{WO}_3$  layer anodised in  $\text{CA}/\text{H}_2\text{O}$  at 0.10 A. (a) Compact oxide layer with cracks forms in a few minutes; (b) field assisted dissolution gradually induces holes mainly along cracks; (c) canyon-like structures composed of nanorods/nanowalls spreads uniformly after anodisation for ca. 30min; (d) pitting corrosion takes place after long anodisation time (>30min).

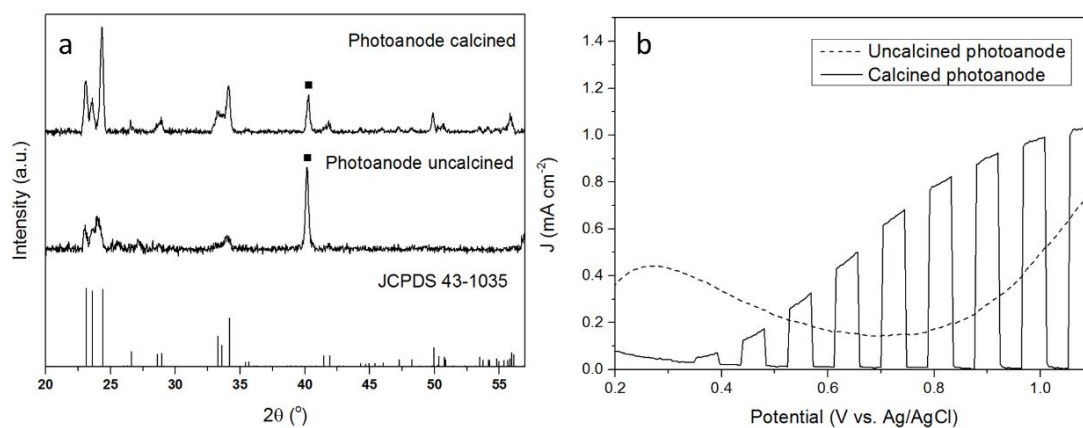

Figure S3. (a) XRD patterns of calcined and uncalcined  $\text{WO}_3$  electrodes prepared by anodisation in  $\text{CA}/\text{H}_2\text{O}$  at 0.10 A for 30 min and (b) their current densities under chopped solar simulated light ( $\text{AM1.5}$ ,  $100 \text{ mWcm}^{-2}$ ). Squares indicate diffraction from metallic tungsten (110) under  $\text{WO}_3$ .

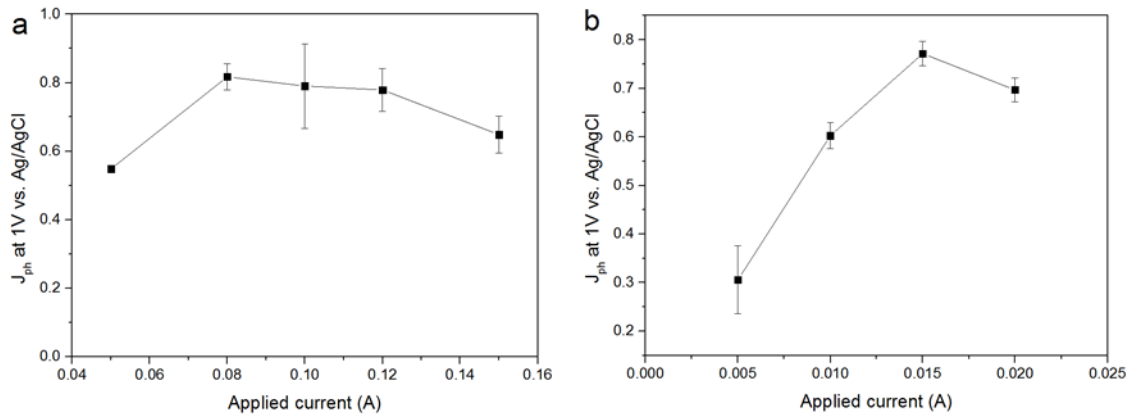

Figure S4. Photocurrent density measured at 1.0 V vs. Ag/AgCl in 0.5 M  $H_2SO_4$  under 1 sun illumination (AM1.5G,  $100 \text{ mW cm}^{-2}$ ) for  $WO_3$  photoanodes produced with CA/ $H_2O$  (a) and CA/NMF/ $H_2O$  (b) solutions for 30 min; the optimised anodising currents were found to be 0.10A and 0.015A, respectively.
